# Supplementary material for: Functional Genome Annotation by Combined Analysis across Microarray Studies of Trypanosoma brucei
Source: PubMed Central journal article supplement (PMC2930875; doi:10.1371/journal.pntd.0000810), 2010-08-31
Supplement: pntd.0000810.s007.pdf [file pntd.0000810.s007.pdf]

**Table S2. Gene-function associations based on the coexpression network CoExp<sup>2</sup><sub>Tbr</sub>.** Pathways are defined according to KEGG. Refer to Table S1 for more details.

|                               | Ribosome | Inositol phosphate metabolism | Phosphatidylinositol signaling | Glycolysis | TriTrypDB annotation (v2.0)                          | Notes |
|-------------------------------|----------|-------------------------------|--------------------------------|------------|------------------------------------------------------|-------|
| Tb927.6.2330                  | *****    |                               |                                |            | RGG protein                                          | a     |
| Tb927.8.1110                  | *        |                               |                                |            | 40S ribosomal protein S9                             |       |
| Tb927.8.1340                  | *****    |                               |                                |            | 60S ribosomal protein L7a                            |       |
| Tb927.7.2370                  | ****     |                               |                                |            | 40S ribosomal protein S15                            |       |
| Tb11.01.5720                  | ****     |                               |                                |            | Ribosomal protein L18                                |       |
| Tb927.6.5130                  | *        |                               |                                |            | 60S acidic ribosomal protein P2                      |       |
| Tb11.02.4360                  | *****    |                               |                                |            | 40S ribosomal protein S21                            |       |
| Tb11.02.2430                  | ***      |                               |                                |            | 60S ribosomal protein L17                            |       |
| Tb927.4.3660                  | ***      |                               |                                |            | Hypothetical protein, conserved                      |       |
| Tb11.01.1465                  | ***      |                               |                                |            | Nascent polypeptide associated complex alpha subunit |       |
| Tb927.5.1110                  | *        |                               |                                |            | 60S ribosomal protein L2, 60S ribosomal protein L8   |       |
| Tb927.3.4360                  | **       |                               |                                |            | 40S ribosomal protein S15A                           |       |
| Tb927.4.5030                  | *        |                               |                                |            | Protein phosphatase 1                                |       |
| Tb09.211.0340                 | ****     |                               |                                |            | 60S ribosomal protein L10                            |       |
| Tb11.01.7730                  | *        |                               |                                |            | Hypothetical protein, conserved                      | b     |
| Tb09.211.3300                 | *        |                               |                                |            | Peroxin 19 (inferred from mutant phenotype)          | c     |
| Tb927.7.3530                  |          | *                             | *                              |            | Hypothetical protein, conserved                      |       |
| Tb927.10.16170 (Tb10.61.0090) |          | *                             | *                              |            | Potassium voltage-gated channel                      | d     |
| Tb11.01.3370                  |          |                               | *                              |            | Glycosomal membrane protein                          | e     |
| Tb927.7.4500                  |          |                               |                                | **         | Hypothetical protein, conserved                      |       |
| Tb927.4.4870                  |          |                               |                                | ***        | Amino acid transporter                               |       |

- \*  $1 \times 10^{-4} < p\text{-value} \leq 0.01$   
 \*\*  $1 \times 10^{-7} < p\text{-value} \leq 1 \times 10^{-4}$   
 \*\*\*  $1 \times 10^{-14} < p\text{-value} \leq 1 \times 10^{-7}$   
 \*\*\*\*  $1 \times 10^{-28} < p\text{-value} \leq 1 \times 10^{-14}$   
 \*\*\*\*\*  $p\text{-value} \leq 1 \times 10^{-28}$

- a RGG domain has been shown previously to interact with ribosomal proteins (J Biol Chem 1998, 273:19025-19029).  
 b Tb11.01.7730 has been reported to be associated with transcription factor II H (Mol Microbiol 2007, 64:1164-1181; Nucleic Acids Res 2009, 37:3811-3820).  
 c Tb09.211.3300 has several Pfam domains, such as Pex19 which is essential for peroxisome biogenesis, and LUC7 which is U1 snRNA-associated protein.  
 d The relationship between Inositol phosphate-mediated signaling and potassium channel activity has been reported in different studies (Proc Natl Acad Sci U S A 2000, 97:8687-8692; Circ Res 2001, 89:1168-1176; Nat Neurosci 2006, 9:1397-1403).  
 e The 3' UTR of Tb11.01.3370 contains the motifs [AT]CTTTT[GT]C[ACGT] and [ACG]AGAA[AC]A[AT][AGT]. Both of these motifs have been previously predicted as potential regulatory elements specific to inositol phosphate metabolism and phosphatidylinositol signaling genes (BMC Genomics 2009, 10:355).
