# Supplementary material for: Functional Genome Annotation by Combined Analysis across Microarray Studies of Trypanosoma brucei
Source: PubMed Central journal article supplement (PMC2930875; doi:10.1371/journal.pntd.0000810), 2010-08-31
Supplement: pntd.0000810.s014.pdf [file pntd.0000810.s014.pdf]

**Table S9. Gene-function associations based on the conserved coexpression network CoExp<sub>TbExLif</sub>.** Pathways are defined according to KEGG. Refer to Table S1 for more details.

|                                | Proteasome | Oxidative phosphorylation | Ribosome | TriTrypDB annotation (v2.0)                      | Notes |
|--------------------------------|------------|---------------------------|----------|--------------------------------------------------|-------|
| Tb927.10.6800 (Tb10.6k15.3970) | *          |                           |          | Developmentally regulated GTP-binding protein    |       |
| Tb927.5.1520                   | *          |                           |          | Heat shock protein HslVU, ATPase subunit HslU    |       |
| Tb927.7.4870                   | **         |                           |          | Hypothetical protein, conserved                  |       |
| Tb09.160.0740                  |            | *                         |          | Hypothetical protein, conserved                  |       |
| Tb927.10.9830 (Tb10.6k15.0480) |            | *                         |          | Hypothetical protein, conserved                  | a     |
| Tb927.10.8320 (Tb10.6k15.2180) |            | *                         |          | Cytochrome oxidase subunit IX                    |       |
| Tb11.02.4120                   |            | **                        |          | Hypothetical protein, conserved                  | a     |
| Tb09.160.1820                  |            | *                         |          | Cytochrome oxidase subunit V                     |       |
| Tb927.10.5050 (Tb10.70.2155)   |            | *                         |          | Hypothetical protein, conserved                  | b     |
| Tb927.10.4240 (Tb10.70.3010)   |            | **                        |          | Hypothetical protein, conserved                  | c,d   |
| Tb927.3.1410                   |            | *                         |          | Cytochrome oxidase subunit VII                   |       |
| Tb927.3.700                    |            | *                         |          | Hypothetical protein, conserved                  | d     |
| Tb927.4.3450                   |            | *                         |          | Hypothetical protein, conserved                  | b,d   |
| Tb927.8.5120                   |            | *                         |          | Cytochrome c                                     |       |
| Tb927.10.520 (Tb10.70.7760)    |            | *                         |          | Hypothetical protein, conserved                  | a     |
| Tb927.5.1060                   |            | **                        |          | Mitochondrial processing peptidase, beta subunit |       |
| Tb927.5.2930                   |            | **                        |          | Hypothetical protein, conserved                  | a     |
| Tb927.4.1360                   |            | *                         |          | Hypothetical protein, conserved                  | e     |
| Tb11.47.0022                   |            | *                         |          | Hypothetical protein, conserved                  | a     |
| Tb927.6.590                    |            | *                         |          | Hypothetical protein, conserved                  | b     |
| Tb927.7.3500                   |            | *                         |          | Glutathione-S-transferase/glutaredoxin           |       |
| Tb927.7.840                    |            | *                         |          | Hypothetical protein, conserved                  | a     |
| Tb927.5.3090                   |            | *                         |          | Hypothetical protein, conserved                  | a     |
| Tb927.10.15960 (Tb10.61.0320)  |            | *                         |          | Hypothetical protein, conserved                  |       |
| Tb927.4.720                    |            | *                         |          | Hypothetical protein, conserved                  | b     |
| Tb927.3.920                    |            | *                         |          | Hypothetical protein, conserved                  |       |
| Tb927.5.590                    |            |                           | *        | Protein phosphatase 1, regulatory subunit        | f     |
| Tb11.01.5720                   |            |                           | *        | Ribosomal protein L18                            |       |
| Tb11.55.0002                   |            |                           | *        | Protein phosphatase 2C                           |       |
| Tb927.4.3660                   |            |                           | *        | Hypothetical protein, conserved                  |       |

\*  $1 \times 10^{-4} < p\text{-value} \leq 0.01$

\*\*  $1 \times 10^{-7} < p\text{-value} \leq 1 \times 10^{-4}$

a These proteins have been shown to be associated with ATP synthase complex (PLoS Pathog 2009, 5:e1000436).

b These proteins have been reported to be mitochondrial (Proteomics 2009, 9:434-450).

c These proteins have been reported to be associated with mitochondrial membrane (Proteomics 2009, 9:5497-5508).

d The mRNA of these proteins have the UAG(G)UA(G/U) element, which is also found in the transcripts of many cytochrome c oxidase subunits (Nucleic Acids Res 2006, 34:5312-5324).

e Tb927.4.1360 is suggested as a PF-specific glycosomal protein (Proteomics 2006, 6:3275-3293).

f Protein phosphatase 1 is known to regulate the activity of ribosomal protein S6 (J Biol Chem 1987, 262:14389-14393).
