# Supplementary material for: Functional Genome Annotation by Combined Analysis across Microarray Studies of Trypanosoma brucei
Source: PubMed Central journal article supplement (PMC2930875; doi:10.1371/journal.pntd.0000810), 2010-08-31
Supplement: pntd.0000810.s015.pdf [file pntd.0000810.s015.pdf]

**Table S10. Prediction of GO terms based on the conserved coexpression network CoExp<sub>TbrxLit</sub>.** Refer to Table S3 for more details.

|              | Biological Process                 |                          | Molecular Function | Cellular Compartment | TriTrypDB annotation (v2.0) |
|--------------|------------------------------------|--------------------------|--------------------|----------------------|-----------------------------|
|              | Cellular protein metabolic process | Regulation of cell cycle |                    |                      |                             |
| Tb11.46.0009 | **                                 | **                       |                    | **                   | Hypothetical protein        |
| Tb927.3.1940 |                                    |                          | *                  |                      | Hypothetical protein        |
| Tb927.5.3090 |                                    |                          | *                  |                      | Hypothetical protein        |
| Tb927.1.1390 |                                    |                          | *                  |                      | Hypothetical protein        |
| Tb927.5.590  |                                    |                          |                    | *                    | Protein phosphatase 1       |

\*  $1 \times 10^{-4} < \text{p-value} \leq 0.01$   
 \*\*  $1 \times 10^{-7} < \text{p-value} \leq 1 \times 10^{-4}$
