# Supplementary material for: Functional Genome Annotation by Combined Analysis across Microarray Studies of Trypanosoma brucei
Source: PLoS Negl Trop Dis. 2010 Aug 31;4(8):e810. doi: 10.1371/journal.pntd.0000810 (PMC2930875; doi:10.1371/journal.pntd.0000810)
Supplement: Table S3 — Prediction of GO biological processes based on the coexpression network CoExp1 Tbr. (0.05 MB PDF) [file pntd.0000810.s008.pdf]

**Table S3. Prediction of GO biological processes based on the coexpression network CoExp<sup>1</sup><sub>Tbr</sub>.** Although some of these predictions correspond to genes that, according to TriTrypDB v2.0, are already annotated, they have not yet been assigned to any GO biological processes. Each prediction should be interpreted as a functional linkage, meaning that the corresponding gene either belongs to the predicted GO category, or has a function that is closely related to that category and, thus, requires synchronized expression.

|               | Glycolysis | rRNA processing | Antigenic variation | Protein folding | Cellular protein metabolic process | Regulation of cell cycle | TriTrypDB annotation (v2.0)                    |
|---------------|------------|-----------------|---------------------|-----------------|------------------------------------|--------------------------|------------------------------------------------|
| Tb927.1.4100  | *          |                 |                     |                 |                                    |                          | Cytochrome oxidase subunit IV                  |
| Tb927.10.1560 |            | *               |                     |                 |                                    |                          | Hypothetical protein                           |
| Tb927.4.4790  |            |                 | *                   |                 |                                    |                          | Hypothetical protein                           |
| Tb927.3.2520  |            |                 | *                   |                 |                                    |                          | Expression site-associated gene (ESAG) protein |
| Tb927.3.2500  |            |                 | *                   |                 |                                    |                          | Hypothetical protein                           |
| Tb927.3.520   |            |                 | *                   |                 |                                    |                          | Expression site-associated gene (ESAG) protein |
| Tb927.3.3540  |            |                 |                     | *               | **                                 | **                       | Nucleoporin                                    |
| Tb927.7.5160  |            |                 |                     |                 | *                                  | *                        | Deoxyuridine triphosphatase                    |
| Tb11.02.0080  |            |                 |                     |                 |                                    | *                        | Hypothetical protein                           |
| Tb927.4.1010  |            |                 |                     |                 |                                    | *                        | Hypothetical protein                           |

\*  $1 \times 10^{-4} < \text{p-value} \leq 0.01$   
 \*\*  $1 \times 10^{-7} < \text{p-value} \leq 1 \times 10^{-4}$
