# Supplementary material for: Functional Genome Annotation by Combined Analysis across Microarray Studies of Trypanosoma brucei
Source: PLoS Negl Trop Dis. 2010 Aug 31;4(8):e810. doi: 10.1371/journal.pntd.0000810 (PMC2930875; doi:10.1371/journal.pntd.0000810)
Supplement: Table S4 — Prediction of GO molecular functions based on the coexpression network CoExp1 Tbr. (0.06 MB PDF) [file pntd.0000810.s009.pdf]

**Table S4. Prediction of GO molecular functions based on the coexpression network CoExp<sup>1</sup><sub>Tbr</sub>.** Refer to Table S3 for more details.

|               | Nucleic acid binding | ATP binding | Protein binding | Unfolded protein binding | TriTrypDB annotation (v2.0) |
|---------------|----------------------|-------------|-----------------|--------------------------|-----------------------------|
| Tb09.211.1040 | *                    |             |                 |                          | Hypothetical protein        |
| Tb927.10.3910 |                      | *           |                 |                          | Hypothetical protein        |
| Tb927.7.5160  |                      | *           |                 |                          | Deoxyuridine triphosphatase |
| Tb927.3.3540  |                      | *           | *               | *                        | Nucleoporin                 |

\*  $1 \times 10^{-4} < \text{p-value} \leq 0.01$
