# Supplementary material for: Functional Genome Annotation by Combined Analysis across Microarray Studies of Trypanosoma brucei
Source: PLoS Negl Trop Dis. 2010 Aug 31;4(8):e810. doi: 10.1371/journal.pntd.0000810 (PMC2930875; doi:10.1371/journal.pntd.0000810)
Supplement: Table S5 — Prediction of GO cellular components based on the coexpression network CoExp1 Tbr. (0.05 MB PDF) [file pntd.0000810.s010.pdf]

**Table S5. Prediction of GO cellular component based on the coexpression network CoExp<sup>1</sup><sub>Tbr</sub>.** Refer to Table S3 for more details.

|                | Cytoplasm | Chaperonin-containing T-complex | Plasma membrane | Cell surface | Integral to membrane | TriTrypDB annotation (v2.0)                    |
|----------------|-----------|---------------------------------|-----------------|--------------|----------------------|------------------------------------------------|
| Tb09.211.1220  | *         |                                 |                 |              |                      | Hypothetical protein                           |
| Tb927.3.1690   | *         |                                 |                 |              |                      | Hypothetical protein                           |
| Tb927.10.14790 | *         |                                 |                 |              |                      | Aminopeptidase                                 |
| Tb927.7.5160   |           | *                               |                 |              |                      | Deoxyuridine triphosphatase                    |
| Tb11.02.4750   |           |                                 | *               |              |                      | Hypothetical protein                           |
| Tb09.211.3880  |           |                                 | *               |              |                      | Hypothetical protein                           |
| Tb927.10.10000 |           |                                 |                 | **           |                      | Hypothetical protein                           |
| Tb927.4.1670   |           |                                 |                 | *            |                      | Hypothetical protein                           |
| Tb09.244.0640  |           |                                 |                 |              | *                    | Variant surface glycoprotein (VSG)             |
| Tb927.3.5690   |           |                                 |                 |              | *                    | Hypothetical protein                           |
| Tb11.01.7530   |           |                                 |                 |              | *                    | Hypothetical protein                           |
| Tb927.4.810    |           |                                 |                 |              | *                    | Expression site-associated gene (ESAG) protein |
| Tb927.10.6720  |           |                                 |                 |              | *                    | Hypothetical protein                           |
| Tb927.1.5160   |           |                                 |                 |              | *                    | Hypothetical protein                           |
| Tb927.10.5700  |           |                                 |                 |              | *                    | Hypothetical protein                           |
| Tb927.3.2520   |           |                                 |                 |              | *                    | Expression site-associated gene (ESAG) protein |
| Tb927.3.2500   |           |                                 |                 |              | *                    | Hypothetical protein                           |
| Tb927.5.310    |           |                                 |                 |              | *                    | Hypothetical protein                           |
| Tb927.5.1400   |           |                                 |                 |              | *                    | Hypothetical protein                           |
| Tb11.02.1564   |           |                                 |                 |              | *                    | Leucine-rich repeat protein (LRRP)             |
| Tb927.3.1490   |           |                                 |                 |              | *                    | Leucine-rich repeat protein (LRRP)             |
| Tb09.211.2060  |           |                                 |                 |              | *                    | Hypothetical protein                           |
| Tb927.8.5080   |           |                                 |                 |              | *                    | Hypothetical protein                           |
| Tb927.3.520    |           |                                 |                 |              | *                    | Expression site-associated gene (ESAG) protein |

\*  $1 \times 10^{-4} < \text{p-value} \leq 0.01$   
 \*\*  $1 \times 10^{-7} < \text{p-value} \leq 1 \times 10^{-4}$
