# Supplementary material for: Functional Genome Annotation by Combined Analysis across Microarray Studies of Trypanosoma brucei
Source: PLoS Negl Trop Dis. 2010 Aug 31;4(8):e810. doi: 10.1371/journal.pntd.0000810 (PMC2930875; doi:10.1371/journal.pntd.0000810)
Supplement: Table S6 — Prediction of GO biological processes based on the coexpression network CoExp2 Tbr. (0.06 MB PDF) [file pntd.0000810.s011.pdf]

**Table S6. Prediction of GO biological processes based on the coexpression network CoExp<sup>2</sup><sub>Tbr</sub>. Refer to Table S3 for more details.**

|                | Translation | Ubiquitin-dependent protein catabolic process | Microtubule-based movement | ATP synthesis coupled proton transport | Antigenic variation | TriTrypDB annotation (v2.0)                                 |
|----------------|-------------|-----------------------------------------------|----------------------------|----------------------------------------|---------------------|-------------------------------------------------------------|
| Tb927.5.4120   | **          |                                               |                            |                                        |                     | Hypothetical protein                                        |
| Tb09.160.2400  | *           |                                               |                            |                                        |                     | Hypothetical protein                                        |
| Tb927.2.4700   | *           |                                               |                            |                                        |                     | Hypothetical protein                                        |
| Tb927.10.12330 | *           |                                               |                            |                                        |                     | Hypothetical protein                                        |
| Tb11.18.0014   | *           |                                               |                            |                                        |                     | Hypothetical protein                                        |
| Tb927.4.3660   | **          |                                               |                            |                                        |                     | Hypothetical protein                                        |
| Tb927.5.2520   | *           |                                               |                            |                                        |                     | Hypothetical protein                                        |
| Tb927.6.2330   | *****       |                                               |                            |                                        |                     | RGG protein                                                 |
| Tb09.211.3300  | *           |                                               |                            |                                        |                     | Peroxin 19                                                  |
| Tb11.02.0445   | *           |                                               |                            |                                        |                     | Hypothetical protein                                        |
| Tb927.4.1340   | **          |                                               |                            |                                        |                     | Cleavage and polyadenylation specificity factor subunit     |
| Tb11.01.8690   | *           |                                               |                            |                                        |                     | Hypothetical protein                                        |
| Tb927.4.5030   | **          |                                               |                            |                                        |                     | Protein phosphatase 1                                       |
| Tb927.6.2210   | *           |                                               |                            |                                        |                     | Hypothetical protein                                        |
| Tb09.160.3160  | *           |                                               |                            |                                        |                     | Hypothetical protein                                        |
| Tb927.7.640    | *           |                                               |                            |                                        |                     | Hypothetical protein                                        |
| Tb927.8.5990   | *           |                                               |                            |                                        |                     | Hypothetical protein                                        |
| Tb11.01.7730   | *           |                                               |                            |                                        |                     | Hypothetical protein                                        |
| Tb927.7.4120   | *           |                                               |                            |                                        |                     | Hypothetical protein                                        |
| Tb927.3.1370   | ***         |                                               |                            |                                        |                     | 40S ribosomal protein S25                                   |
| Tb927.10.12310 |             | *                                             |                            |                                        |                     | Helicase-like protein                                       |
| Tb09.211.1270  |             |                                               | *                          |                                        |                     | Hypothetical protein                                        |
| Tb11.02.3880   |             |                                               | *                          |                                        |                     | Hypothetical protein                                        |
| Tb11.02.4120   |             |                                               |                            | **                                     |                     | Hypothetical protein                                        |
| Tb927.3.2180   |             |                                               |                            | **                                     |                     | Hypothetical protein                                        |
| Tb09.142.0310  |             |                                               |                            |                                        | *                   | Expression site-associated gene (ESAG) protein              |
| Tb09.211.4820  |             |                                               |                            |                                        | **                  | Hypothetical protein                                        |
| Tb927.10.8980  |             |                                               |                            |                                        | ***                 | Hypothetical protein                                        |
| Tb09.160.1440  |             |                                               |                            |                                        | **                  | Hypothetical protein                                        |
| Tb11.02.1470   |             |                                               |                            |                                        | ***                 | Hypothetical protein                                        |
| Tb927.4.990    |             |                                               |                            |                                        | **                  | Hypothetical protein                                        |
| Tb11.38.0003   |             |                                               |                            |                                        | ***                 | Variant surface glycoprotein (VSG)                          |
| Tb927.3.5830   |             |                                               |                            |                                        | ***                 | Expression site-associated gene (ESAG) protein              |
| Tb927.1.5030   |             |                                               |                            |                                        | **                  | Leucine-rich repeat protein (LRRP)                          |
| Tb09.244.1950  |             |                                               |                            |                                        | ***                 | Hypothetical protein                                        |
| Tb927.5.750    |             |                                               |                            |                                        | **                  | Hypothetical protein                                        |
| Tb927.3.2520   |             |                                               |                            |                                        | **                  | Expression site-associated gene (ESAG) protein              |
| Tb927.10.5700  |             |                                               |                            |                                        | *                   | Hypothetical protein                                        |
| Tb927.5.390    |             |                                               |                            |                                        | **                  | 75 kDa invariant surface glycoprotein                       |
| Tb11.01.7860   |             |                                               |                            |                                        | *                   | Hypothetical protein                                        |
| Tb927.3.1870   |             |                                               |                            |                                        | **                  | Hypothetical protein                                        |
| Tb927.6.540    |             |                                               |                            |                                        | ***                 | Gene related to expression site-associated gene 2 (GRESAG2) |

\*  $1 \times 10^{-4} < \text{p-value} \leq 0.01$   
 \*\*  $1 \times 10^{-7} < \text{p-value} \leq 1 \times 10^{-4}$   
 \*\*\*  $1 \times 10^{-14} < \text{p-value} \leq 1 \times 10^{-7}$   
 \*\*\*\*  $1 \times 10^{-28} < \text{p-value} \leq 1 \times 10^{-14}$   
 \*\*\*\*\*  $\text{p-value} \leq 1 \times 10^{-28}$
