# Supplementary material for: Functional Genome Annotation by Combined Analysis across Microarray Studies of Trypanosoma brucei
Source: PLoS Negl Trop Dis. 2010 Aug 31;4(8):e810. doi: 10.1371/journal.pntd.0000810 (PMC2930875; doi:10.1371/journal.pntd.0000810)
Supplement: Table S7 — Prediction of GO molecular functions based on the coexpression network CoExp2 Tbr. (0.05 MB PDF) [file pntd.0000810.s012.pdf]

**Table S7. Prediction of GO molecular functions based on the coexpression network CoExp<sup>2</sup><sub>Tbr</sub>.** Refer to Table S3 for more details.

|               | Structural constituent of ribosome | Microtubule motor activity | Catalytic activity | TriTrypDB annotation (v2.0)         |
|---------------|------------------------------------|----------------------------|--------------------|-------------------------------------|
| Tb927.5.4120  | **                                 |                            |                    | Hypothetical protein                |
| Tb09.160.2400 | *                                  |                            |                    | Hypothetical protein                |
| Tb927.2.4700  | *                                  |                            |                    | Hypothetical protein                |
| Tb927.4.3660  | **                                 |                            |                    | Hypothetical protein                |
| Tb927.10.3970 | *                                  |                            |                    | Hypothetical protein                |
| Tb11.02.0445  | *                                  |                            |                    | Hypothetical protein                |
| Tb09.160.3160 | *                                  |                            |                    | Hypothetical protein                |
| Tb11.01.7730  | *                                  |                            |                    | Hypothetical protein                |
| Tb927.7.4120  | *                                  |                            |                    | Hypothetical protein                |
| Tb927.3.1370  | ***                                |                            |                    | 40S ribosomal protein S25           |
| Tb09.211.1270 |                                    | *                          |                    | Hypothetical protein                |
| Tb11.02.3880  |                                    | *                          |                    | Hypothetical protein                |
| Tb927.3.3690  |                                    | *                          |                    | Flagellar radial spoke protein-like |
| Tb11.46.0005  |                                    |                            | **                 | Hypothetical protein                |

\*  $1 \times 10^{-4} < \text{p-value} \leq 0.01$

\*\*  $1 \times 10^{-7} < \text{p-value} \leq 1 \times 10^{-4}$

\*\*\*  $1 \times 10^{-14} < \text{p-value} \leq 1 \times 10^{-7}$
